# Supplementary material for: Omega-3 Fatty Acid-Type Docosahexaenoic Acid Protects against Aβ-Mediated Mitochondrial Deficits and Pathomechanisms in Alzheimer’s Disease-Related Animal Model
Source: PubMed Central journal article supplement (PMC7312360; doi:10.3390/ijms21113879), 2020-05-29
Supplement: ijms-21-03879-s001.pdf [file ijms-21-03879-s001.pdf]

Supplementary figure

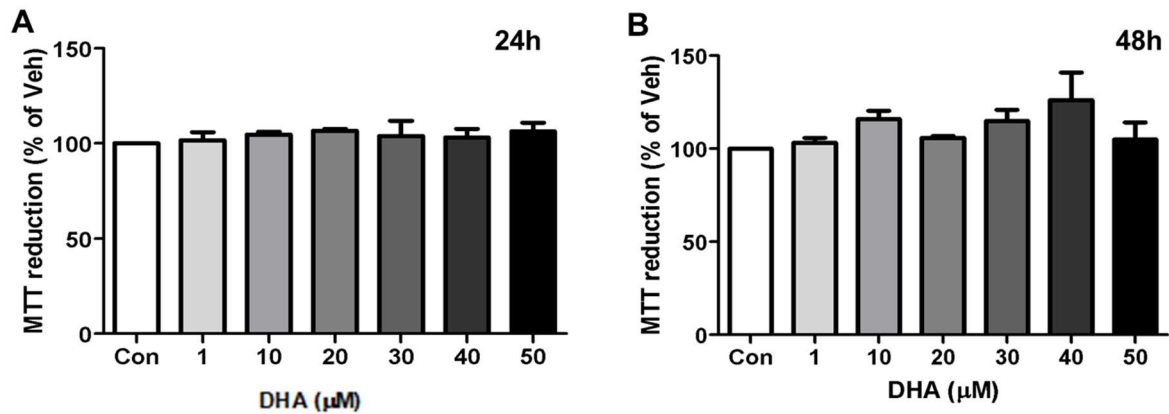

Figure S1. Cytotoxicity evaluation of DHA in HT22 cell line through MTT assay. HT22 cells were treated with 1, 10, 20, 40, or 50  $\mu\text{M}$  DHA and MTT reduction was analyzed after 24 (A) or 48 (B) h.

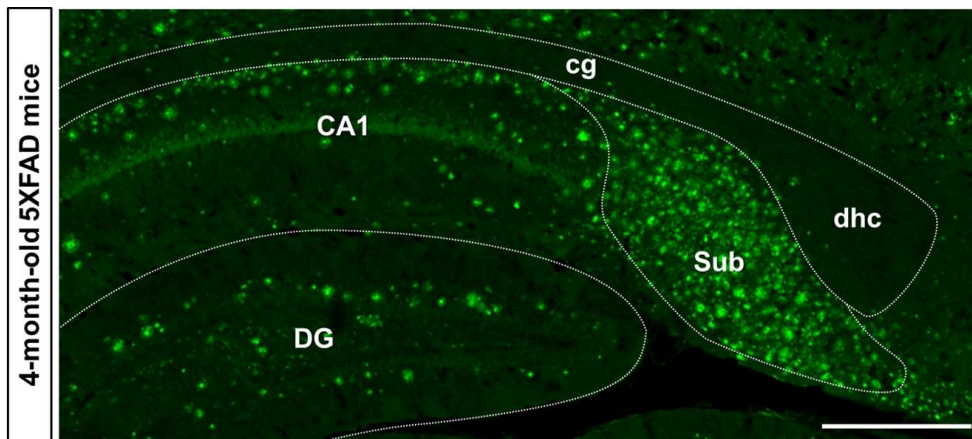

Figure S2. Distribution of  $\text{A}\beta$  plaque in the hippocampal formation of 5XFAD mice.  $\text{A}\beta$  plaques were visualized in the hippocampus of 5XFAD mice using 4G8 antibody. Sub: Subiculum, CA1: hippocampal field CA1 of hippocampus, DG: dentate gyrus, cg: cingulum, dhc: dorsal hippocampal commissure.

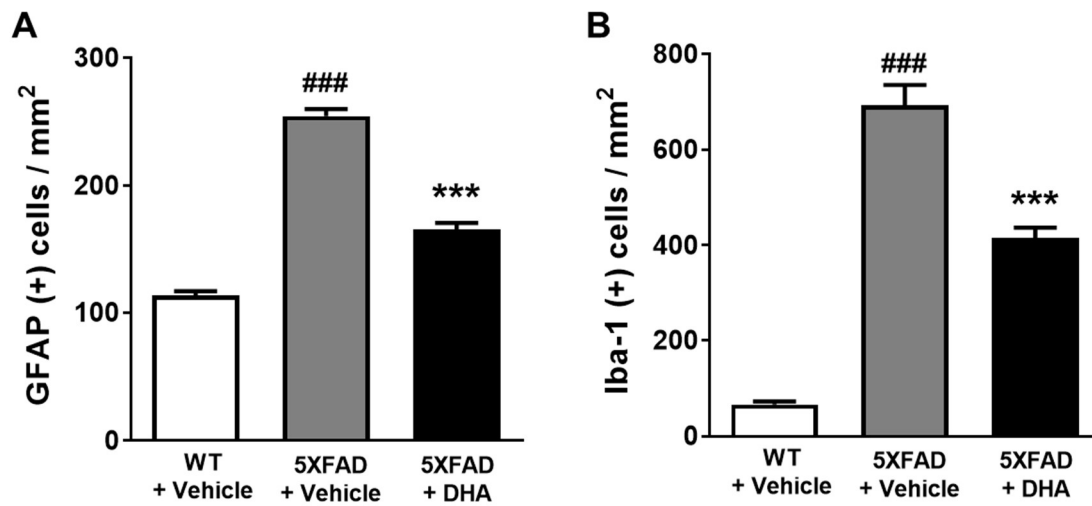

Figure S3. Quantification of Iba-1 and GFAP in the subiculum of DHA-administered 5XFAD mice. As a result of quantifying the numbers of Iba-1 (A) and GFAP (B) positive cells per area of the dorsal subiculum, both significantly upregulated numbers of Iba-1 and GFAP (+) cells in the 5XFAD mice were significantly alleviated by administration of DHA. Each histological qualitative data are presented as mean  $\pm$  SEM (42 images / 7 mice). <sup>###</sup> $p < 0.001$ : vehicle-treated WT mice versus vehicle-treated 5XFAD mice. <sup>\*\*\*</sup> $p < 0.001$ : vehicle-treated 5XFAD mice versus DHA-treated 5XFAD mice.

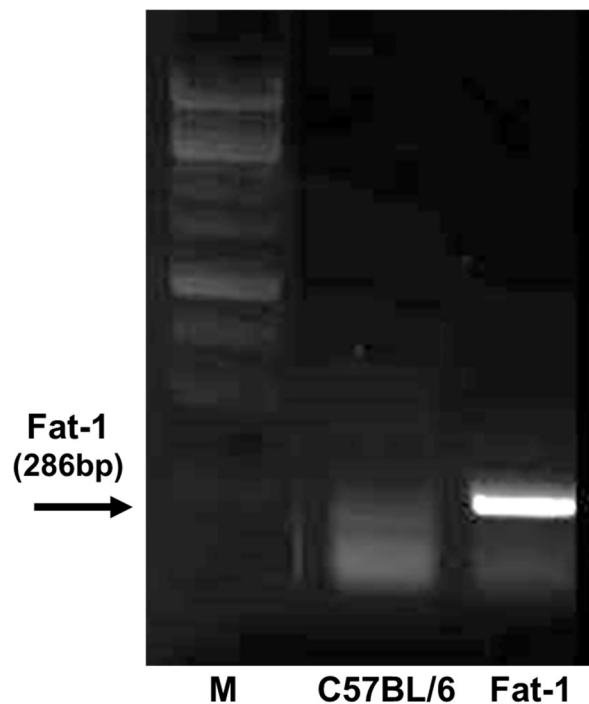

Figure S4. Validation of fat-1 transgene expression in C57BL/6 and fat-1 mice by PCR.

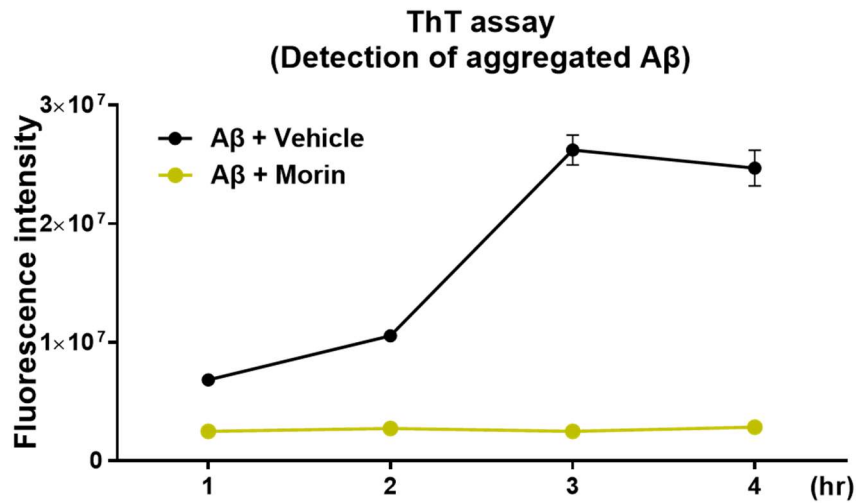

Figure S5. Characterization of A $\beta$  aggregation. ThT assay showed the aggregation of A $\beta$  over time from 1-4 hours as the intensity of fluorescence. Morin was used as an indicator for anti-aggregation of A $\beta$ . Inhibitor of A $\beta$  oligomerization, morin inhibited the self-aggregation of monomeric A $\beta$ , resulting to maintaining the unaggregated A $\beta$ .

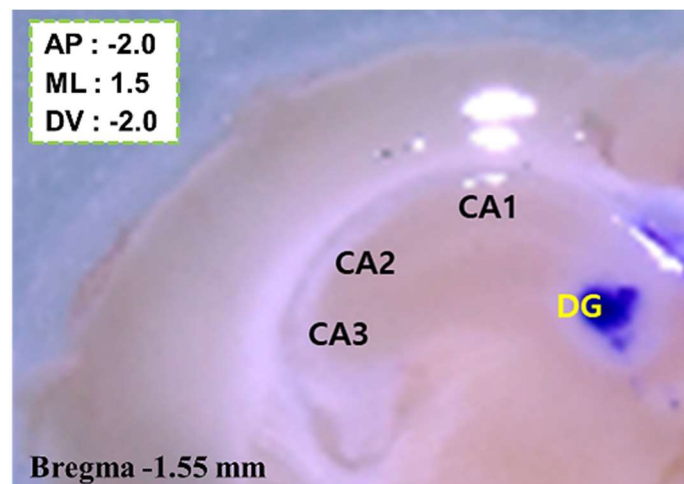

Figure S6. Validation of the stereotaxic injection in to the hilus of dentate gyrus. 1.5  $\mu$ l of 0.1% cresyl violet (CV) solution was injected according to stereotactic coordinates (AP -2.0 mm, ML + 1.5 mm, and DV -2.0 mm) for 3 min at a rate of 0.5  $\mu$ l/min. After injection, the mouse was sacrificed to extract the brain. the injected CV observed at a coronal section from bregma -1.55 mm. CA1-3: hippocampal field CA1-3 of hippocampus, DG: dentate gyrus.

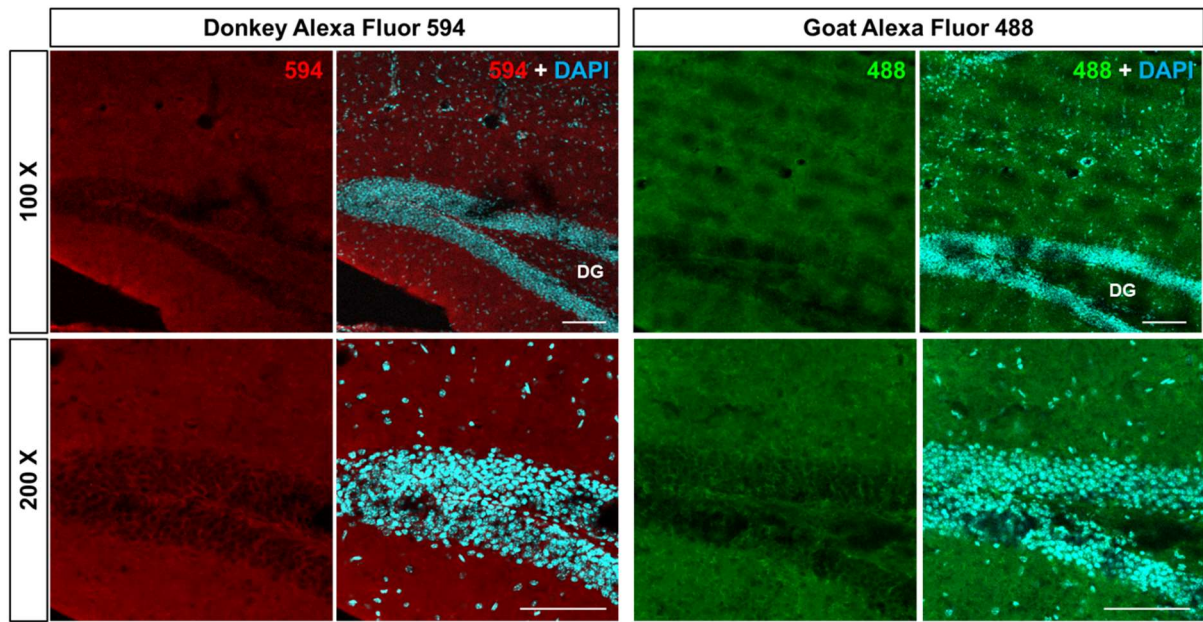

Figure S7. Validation of the immunohistochemistry. According to the immunohistochemical procedure, brain tissues were cultured in the absence of primary antibodies, followed by culturing fluorescence-conjugated secondary antibodies 1) Donkey Alexa Fluor 594 (left) or 2) Goat Alexa Fluor 488 (right) to obtain primary antibody negative control staining. Verify that there is no non-specific signal in the absence of primary antibody.
